# Supplementary material for: Artificial Neural Network Prediction of Antiadhesion and Antibiofilm-Forming Effects of Antimicrobial Active Mushroom Extracts on Food-Borne Pathogens
Source: MDPI journal article supplement (doi:10.3390/antibiotics12030627), 2023-03-22
Supplement: s1 [file s1]

**Table S1:** The list of mushroom species and their abbreviations

| Species                                         | Abbreviation |
|-------------------------------------------------|--------------|
| <i>Meripilus giganteus</i> water extract        | MgV          |
| <i>M. giganteus</i> alkali extract              | MgA          |
| <i>Agaricus silvaticus</i> water extract        | AsV          |
| <i>A. silvaticus</i> alkali extract             | AsA          |
| <i>Craterellus cornucopioides</i> water extract | CcV          |
| <i>C. cornucopioides</i> alkali extract         | CcA          |
| <i>Ganoderma applanatum</i> water extract       | GaV          |
| <i>G. applanatum</i> alkali extract             | GaA          |
| <i>Piptoporus betulinus</i> water extract       | PbV          |
| <i>P. betulinus</i> alkali extract              | PbA          |
| <i>Laetiporus sulphureus</i> water extract      | LsV          |
| <i>L. sulphureus</i> alkali extract             | LsA          |
| <i>Schizophyllum commune</i> water extract      | ScV          |
| <i>S. commune</i> alkali extract                | ScA          |
| <i>Fomitopsis pinicola</i> water extract        | FpV          |
| <i>F. pinicola</i> alkali extract               | FpA          |
| <i>Boletus edulis</i> water extract             | BeV          |
| <i>B. edulis</i> alkali extract                 | BeA          |
| <i>Clitocybe geotropa</i> water extract         | CgV          |
| <i>C. geotropa</i> alkali extract               | CgA          |
| <i>Lenzites betulinus</i> water extract         | LbV          |
| <i>L. betulinus</i> alkali extract              | LbA          |
| <i>Polyporus squamosus</i> water extract        | PsV          |
| <i>P. squamosus</i> alkali extract              | PsA          |
| <i>Cantharellus cibarius</i> water extract      | ChcV         |
| <i>C. cibarius</i> alkali extract               | ChcA         |
| <i>Agrocybe aegerita</i> water extract          | AaV          |
| <i>A. aegerita</i> alkali extract               | AaA          |
| <i>Trametes versicolor</i> water extract        | TvV          |
| <i>T. versicolor</i> alkali extract             | TvA          |
| <i>Daedalea quercina</i> water extract          | DqV          |
| <i>D. quercina</i> alkali extract               | DqA          |
| <i>Auricularia mezenterica</i> water extract    | AmV          |
| <i>A. mezenterica</i> alkali extract            | AmA          |
| <i>Picipes badius</i> water extract             | PibV         |
| <i>P. badius</i> alkali extract                 | PibA         |
| <i>Ganoderma lucidum</i> water extract          | GlV          |
| <i>G. lucidum</i> alkali extract                | GlA          |
| <i>Fistulina hepatica</i> water extract         | FhV          |
| <i>F. hepatica</i> alkali extract               | FhA          |

**Table S2.** Antiadhesion and antibiofilm-forming activity of water and alkali mushroom extracts against *L. monocytogenes* ATCC 19111 and *S. enteritidis* ATCC 13076

|    | conc.<br>(mg/mL) | Water extract           |            |                       |            | Alkali extract          |            |                       |            |
|----|------------------|-------------------------|------------|-----------------------|------------|-------------------------|------------|-----------------------|------------|
|    |                  | <i>L. monocytogenes</i> |            | <i>S. enteritidis</i> |            | <i>L. monocytogenes</i> |            | <i>S. enteritidis</i> |            |
|    |                  | %IA                     | %IB        | %IA                   | %IB        | %IA                     | %IB        | %IA                   | %IB        |
| Mg | 0.156            | 64.37±1.30              | 93.94±1.90 | 14.29±2.19            | 64.21±2.73 | 43.41±3.41              | 87.77±3.57 | 0.00±0.00             | 70.67±3.10 |
|    | 0.312            | 71.26±2.77              | 93.79±3.19 | 17.65±1.89            | 72.84±1.74 | 47.31±3.16              | 87.60±0.93 | 9.24±2.90             | 77.66±3.08 |
|    | 0.625            | 70.06±3.92              | 89.81±3.30 | 16.39±1.12            | 88.41±4.78 | 28.14±2.77              | 82.28±3.41 | 9.80±0.89             | 0.00±0.00  |
|    | 1.25             | 65.97±2.72              | 94.16±1.15 | 22.69±2.04            | 55.56±4.57 | 41.92±3.48              | 87.70±1.25 | 14.29±1.62            | 0.00±0.00  |
|    | 2.5              | 48.70±2.30              | 69.13±3.37 | 21.01±1.38            | 20.99±2.57 | 43.41±1.48              | 63.80±2.91 | 15.97±2.01            | 0.00±0.00  |
| As | 0.156            | 54.37±1.63              | 70.83±7.21 | 21.11±2.24            | 97.36±4.00 | 48.74±2.41              | 27.65±1.33 | 24.44±2.98            | 98.34±0.48 |
|    | 0.312            | 54.88±1.00              | 80.76±3.75 | 22.59±3.07            | 91.25±1.24 | 44.63±1.54              | 57.98±2.46 | 25.93±3.66            | 92.98±0.78 |
|    | 0.625            | 52.23±1.57              | 78.29±3.77 | 25.43±3.95            | 91.68±1.76 | 52.51±1.70              | 69.30±1.49 | 20.49±1.93            | 94.89±0.92 |
|    | 1.25             | 54.57±2.34              | 73.18±3.35 | 18.52±3.92            | 88.21±1.75 | 57.53±1.52              | 50.38±1.18 | 18.89±1.91            | 97.08±2.54 |
|    | 2.5              | 52.48±2.19              | 69.78±1.75 | 9.63±4.64             | 65.34±0.68 | 58.22±1.02              | 44.87±1.58 | 16.30±3.73            | 52.57±5.79 |
| Cc | 0.156            | 62.80±1.02              | 91.63±0.45 | 4.04±2.09             | 25.67±0.67 | 70.34±2.04              | 68.39±1.00 | 13.23±2.50            | 67.59±5.47 |
|    | 0.312            | 60.79±1.48              | 93.29±0.73 | 4.93±2.56             | 34.69±1.32 | 75.99±0.74              | 67.91±2.63 | 15.25±3.16            | 75.86±1.96 |
|    | 0.625            | 60.91±2.12              | 95.31±0.63 | 1.79±1.69             | 0.00±0.00  | 74.99±1.77              | 60.79±1.16 | 10.87±1.77            | 84.95±6.01 |
|    | 1.25             | 66.44±1.15              | 95.40±2.90 | 0.00±0.00             | 0.00±0.00  | 74.17±1.15              | 65.85±1.19 | 6.84±2.82             | 75.21±3.93 |
|    | 2.5              | 60.28±0.52              | 89.98±2.01 | 0.00±0.00             | 0.00±0.00  | 69.59±0.97              | 0.00±0.00  | 0.00±0.00             | 44.71±2.00 |
| Ga | 0.156            | 57.71±1.06              | 37.90±3.22 | 29.38±2.27            | 30.88±2.49 | 78.30±1.94              | 61.03±2.84 | 21.60±3.68            | 14.78±0.99 |
|    | 0.312            | 60.75±2.59              | 15.13±2.57 | 27.18±2.37            | 43.16±2.11 | 78.94±2.03              | 55.65±0.91 | 23.69±3.28            | 25.07±1.46 |
|    | 0.625            | 61.16±3.26              | 49.61±1.94 | 24.74±2.36            | 49.20±1.69 | 80.82±2.57              | 84.89±5.06 | 25.09±4.11            | 50.70±3.52 |
|    | 1.25             | 62.02±1.48              | 41.42±2.37 | 28.46±1.13            | 40.11±2.76 | 79.02±1.63              | 79.28±4.00 | 24.74±3.47            | 51.56±2.66 |
|    | 2.5              | 61.65±4.51              | 0.00±0.00  | 11.27±1.79            | 23.06±2.58 | 76.97±0.95              | 0.00±0.00  | 26.83±3.08            | 33.18±1.89 |
| Pb | 0.156            | 67.06±4.00              | 90.78±1.22 | 16.23±3.40            | 73.11±2.10 | 58.08±5.78              | 84.72±2.95 | 14.83±1.13            | 86.16±2.43 |
|    | 0.312            | 64.45±1.75              | 90.22±1.89 | 16.28±2.53            | 90.82±2.55 | 49.31±1.71              | 84.76±2.53 | 15.18±2.39            | 89.08±2.09 |
|    | 0.625            | 60.23±4.12              | 95.11±1.95 | 19.02±2.10            | 70.72±5.97 | 38.63±3.44              | 94.80±1.82 | 16.23±2.54            | 99.21±2.55 |
|    | 1.25             | 51.54±5.60              | 95.04±1.51 | 19.00±1.33            | 60.13±4.72 | 30.02±4.56              | 88.16±0.92 | 20.42±1.79            | 54.39±3.25 |
|    | 2.5              | 56.96±2.92              | 0.00±0.00  | 0.00±0.00             | 0.00±0.00  | 0.00±0.00               | 0.00±0.00  | 0.00±0.00             | 45.02±1.62 |
| Ls | 0.156            | 49.68±1.12              | 75.82±0.99 | 0.00±0.00             | 0.00±0.00  | 51.61±6.54              | 73.94±1.97 | 26.36±1.38            | 49.91±6.46 |
|    | 0.312            | 53.18±3.90              | 69.67±1.34 | 0.00±0.00             | 0.00±0.00  | 55.46±1.35              | 68.07±0.63 | 35.56±2.47            | 56.96±5.89 |
|    | 0.625            | 57.71±3.21              | 67.16±0.93 | 0.00±0.00             | 7.43±2.02  | 56.17±1.64              | 69.34±2.84 | 39.75±2.51            | 69.43±3.57 |
|    | 1.25             | 57.60±7.26              | 62.96±4.17 | 0.00±0.00             | 17.67±1.35 | 56.96±3.66              | 54.30±2.81 | 40.31±2.32            | 69.80±5.50 |
|    | 2.5              | 58.03±3.12              | 45.67±2.68 | 0.00±0.00             | 30.68±1.80 | 55.03±2.84              | 84.13±1.76 | 17.99±1.75            | 63.32±5.79 |
| Sc | 0.156            | 59.75±2.15              | 75.54±1.26 | 3.65±0.49             | 99.19±3.05 | 61.72±2.17              | 87.74±1.25 | 16.76±1.70            | 96.19±4.36 |
|    | 0.312            | 55.08±1.70              | 83.36±1.57 | 1.69±0.68             | 99.95±2.19 | 58.79±1.48              | 88.47±4.16 | 14.47±1.97            | 98.39±1.23 |
|    | 0.625            | 59.89±0.53              | 87.08±1.05 | 0.05±0.18             | 87.84±1.08 | 59.75±1.69              | 94.66±5.63 | 12.17±1.70            | 99.92±1.05 |
|    | 1.25             | 57.77±2.76              | 86.39±3.88 | 0.00±0.00             | 42.4±1.23  | 58.47±2.29              | 99.48±1.73 | 6.60±2.25             | 97.72±1.05 |
|    | 2.5              | 61.58±3.16              | 78.263.93  | 0.00±0.00             | 33.33±0.91 | 55.30±0.75              | 91.49±2.09 | 0.00±0.00             | 52.58±2.72 |
| Fp | 0.156            | 49.60±2.14              | 79.99±1.58 | 0.00±0.00             | 73.78±2.67 | 52.21±3.38              | 85.73±3.98 | 9.72±1.12             | 86.80±2.02 |
|    | 0.312            | 50.00±5.82              | 82.74±2.26 | 0.00±0.00             | 82.17±2.61 | 53.21±4.62              | 84.00±2.34 | 7.87±2.34             | 86.13±1.50 |
|    | 0.625            | 41.97±5.00              | 87.58±1.56 | 0.00±0.00             | 96.97±2.21 | 60.64±3.18              | 95.16±1.51 | 2.78±2.06             | 60.70±1.28 |
|    | 1.25             | 42.57±5.17              | 83.99±1.06 | 0.00±0.00             | 98.62±3.72 | 63.19±2.45              | 99.67±1.69 | 0.00±0.00             | 57.56±2.01 |
|    | 2.5              | 30.72±7.53              | 65.84±5.17 | 0.00±0.00             | 62.91±4.13 | 53.55±0.39              | 85.43±2.93 | 0.00±0.00             | 0.00±0.00  |
| Be | 0.156            | 49.73±0.93              | 83.99±2.17 | 9.70±3.32             | 75.90±4.18 | 59.81±1.94              | 88.80±2.08 | 11.52±3.10            | 86.42±2.64 |
|    | 0.312            | 47.96±1.63              | 65.59±2.44 | 1.21±0.98             | 85.63±3.94 | 59.74±2.06              | 97.91±5.00 | 6.67±1.74             | 90.18±1.21 |
|    | 0.625            | 43.05±1.79              | 65.65±1.55 | 0.00±0.00             | 87.34±1.90 | 59.35±2.75              | 74.57±4.36 | 4.85±3.15             | 92.41±2.63 |
|    | 1.25             | 32.25±4.58              | 88.81±3.80 | 0.00±0.00             | 85.21±2.63 | 55.20±1.60              | 73.38±1.36 | 0.00±0.00             | 89.61±2.16 |
|    | 2.5              | 18.57±3.78              | 37.97±2.72 | 0.00±0.00             | 41.22±0.89 | 43.09±2.25              | 26.61±1.94 | 0.00±0.00             | 53.26±2.69 |
| Cg | 0.156            | 61.75±1.30              | 89.23±0.76 | 9.40±1.45             | 74.64±1.32 | 70.35±2.31              | 87.83±1.58 | 22.48±1.72            | 78.42±4.24 |
|    | 0.312            | 62.82±2.21              | 86.69±0.34 | 0.00±0.00             | 44.84±1.87 | 67.36±3.31              | 90.24±3.06 | 27.52±3.90            | 92.11±1.61 |
|    | 0.625            | 64.26±1.06              | 84.71±1.19 | 0.00±0.00             | 36.01±0.66 | 67.60±2.33              | 90.08±1.22 | 29.78±3.81            | 92.54±1.87 |
|    | 1.25             | 63.66±1.98              | 71.97±0.63 | 0.00±0.00             | 0.00±0.00  | 66.47±3.26              | 95.18±1.25 | 29.87±3.14            | 86.29±1.07 |
|    | 2.5              | 59.12±1.23              | 66.66±2.22 | 0.00±0.00             | 0.00±0.00  | 60.31±2.74              | 89.62±1.78 | 13.42±3.80            | 28.00±1.87 |
|    | 0.156            | 37.91±1.24              | 98.49±1.69 | 24.19±2.38            | 0.00±0.00  | 46.06±3.50              | 95.49±3.60 | 45.52±2.45            | 42.90±2.41 |
|    | 0.312            | 42.30±2.99              | 97.08±2.69 | 36.50±3.86            | 22.81±0.36 | 54.84±1.64              | 87.31±3.97 | 47.33±0.82            | 28.45±2.43 |

|     |       |            |            |            |            |            |             |            |            |
|-----|-------|------------|------------|------------|------------|------------|-------------|------------|------------|
| Lb  | 0.625 | 37.70±3.98 | 93.50±3.68 | 45.19±1.29 | 61.41±2.03 | 63.41±2.70 | 78.34±3.96  | 49.54±3.40 | 83.94±1.74 |
|     | 1.25  | 37.28±2.84 | 64.91±2.14 | 49.13±4.55 | 72.03±5.24 | 62.51±1.20 | 49.99±3.42  | 51.27±4.12 | 92.57±4.56 |
|     | 2.5   | 35.40±2.90 | 53.15±3.48 | 38.96±1.19 | 72.64±0.65 | 40.21±4.44 | 0.00±0.00   | 39.94±2.83 | 0.00±0.00  |
| Ps  | 0.156 | 43.66±2.49 | 68.55±1.36 | 11.58±4.53 | 0.00±0.00  | 54.45±1.69 | 90.94±2.83  | 46.61±4.69 | 0.00±0.00  |
|     | 0.312 | 50.86±3.15 | 67.98±2.94 | 18.60±5.25 | 0.00±0.00  | 54.45±2.42 | 90.82±1.43  | 46.37±1.99 | 7.15±1.84  |
|     | 0.625 | 50.62±0.73 | 71.04±4.01 | 24.67±5.45 | 0.00±0.00  | 51.10±2.56 | 96.54±2.67  | 48.77±2.86 | 16.92±1.36 |
| Chc | 1.25  | 46.30±2.20 | 62.42±1.76 | 24.35±5.23 | 0.00±0.00  | 51.00±2.67 | 99.59±1.70  | 51.64±2.70 | 52.83±3.88 |
|     | 2.5   | 45.34±3.87 | 62.72±2.55 | 21.48±5.65 | 0.00±0.00  | 47.02±3.05 | 99.08±1.83  | 44.14±4.43 | 0.00±0.00  |
|     | 0.156 | 62.06±1.42 | 92.66±1.76 | 18.03±2.71 | 31.07±3.20 | 53.23±3.08 | 86.12±2.82  | 35.53±1.03 | 88.28±4.80 |
| Aa  | 0.312 | 65.15±1.22 | 99.96±2.08 | 21.73±3.32 | 46.56±2.89 | 60.17±2.15 | 91.61±0.67  | 34.61±3.42 | 89.37±1.50 |
|     | 0.625 | 65.50±1.02 | 85.30±3.80 | 30.92±2.91 | 53.15±0.93 | 67.63±0.98 | 87.23±0.73  | 34.66±3.47 | 86.82±1.75 |
|     | 1.25  | 65.74±2.97 | 81.98±4.82 | 20.10±2.66 | 48.89±1.84 | 69.24±3.18 | 69.76±5.01  | 33.07±1.76 | 79.89±4.93 |
| Tv  | 2.5   | 66.33±1.31 | 39.43±2.12 | 0.00±0.00  | 0.00±0.00  | 69.77±2.91 | 51.40±1.46  | 18.26±0.99 | 69.62±2.40 |
|     | 0.156 | 19.58±4.68 | 98.21±2.20 | 15.14±1.33 | 57.34±2.63 | 26.98±3.42 | 97.51±2.55  | 35.58±1.42 | 99.25±3.87 |
|     | 0.312 | 22.22±3.78 | 88.94±3.42 | 9.94±0.77  | 57.36±6.85 | 29.37±5.06 | 99.89±1.21  | 37.50±1.22 | 92.36±5.98 |
| Dq  | 0.625 | 25.40±2.80 | 93.48±2.27 | 0.00±0.00  | 72.94±5.50 | 30.95±4.02 | 99.41±2.94  | 42.79±1.51 | 91.96±3.52 |
|     | 1.25  | 27.78±3.01 | 99.71±0.68 | 0.00±0.00  | 35.48±2.75 | 32.54±2.11 | 98.55±47.89 | 25.00±0.80 | 86.78±3.11 |
|     | 2.5   | 28.57±3.64 | 92.35±1.09 | 0.00±0.00  | 0.00±0.00  | 26.98±2.93 | 47.89±1.66  | 0.96±0.32  | 58.69±5.19 |
| Am  | 0.156 | 18.72±2.76 | 87.98±3.20 | 9.92±2.49  | 0.00±0.00  | 25.55±1.93 | 88.14±1.66  | 47.57±3.03 | 98.80±3.88 |
|     | 0.312 | 27.60±3.07 | 84.80±2.08 | 19.51±1.57 | 0.00±0.00  | 27.60±1.87 | 73.69±4.55  | 49.60±1.28 | 83.51±2.86 |
|     | 0.625 | 34.77±1.27 | 77.37±2.39 | 43.14±2.53 | 0.00±0.00  | 39.89±3.19 | 67.79±2.79  | 51.08±2.16 | 61.48±2.60 |
| Pib | 1.25  | 36.48±2.31 | 73.00±1.42 | 53.73±4.09 | 0.00±0.00  | 39.21±4.78 | 49.81±4.72  | 53.23±2.49 | 0.00±0.00  |
|     | 2.5   | 39.21±1.06 | 41.64±1.61 | 58.65±2.07 | 0.00±0.00  | 31.69±4.12 | 32.55±3.18  | 29.11±3.58 | 0.00±0.00  |
|     | 0.156 | 35.62±1.20 | 92.13±1.16 | 9.69±4.20  | 43.38±1.33 | 39.98±3.20 | 59.58±1.97  | 36.74±3.82 | 59.53±3.91 |
| Gl  | 0.312 | 44.35±1.80 | 88.91±1.16 | 27.59±2.06 | 57.03±1.30 | 30.71±1.74 | 79.54±3.99  | 38.41±3.54 | 61.55±0.81 |
|     | 0.625 | 45.44±1.80 | 87.05±1.63 | 30.71±2.62 | 60.14±3.56 | 30.89±2.01 | 86.69±2.38  | 38.96±2.28 | 73.12±2.57 |
|     | 1.25  | 46.71±2.44 | 74.68±2.68 | 40.90±2.42 | 74.90±4.55 | 32.89±1.50 | 90.96±1.38  | 40.35±4.06 | 83.27±3.18 |
| Fh  | 2.5   | 55.26±2.78 | 56.64±1.62 | 3.03±1.43  | 64.45±0.89 | 25.25±1.21 | 11.56±1.08  | 46.45±3.39 | 88.25±3.55 |
|     | 0.156 | 33.33±1.99 | 59.79±0.77 | 0.00±0.00  | 67.80±6.73 | 48.80±3.80 | 67.52±2.09  | 16.55±2.05 | 85.58±2.45 |
|     | 0.312 | 37.60±2.29 | 63.88±1.25 | 0.00±0.00  | 65.95±4.71 | 49.87±2.40 | 69.45±2.78  | 14.63±2.50 | 81.89±2.91 |
| Pib | 0.625 | 41.87±2.35 | 64.81±4.55 | 0.00±0.00  | 60.70±3.73 | 58.40±3.52 | 32.11±1.96  | 7.43±3.26  | 79.93±1.90 |
|     | 1.25  | 44.80±1.63 | 82.15±3.83 | 0.00±0.00  | 27.63±1.34 | 61.07±1.85 | 10.89±3.24  | 3.60±2.34  | 67.43±2.02 |
|     | 2.5   | 45.60±3.91 | 30.3±4.82  | 0.00±0.00  | 0.00±0.00  | 53.96±1.85 | 0.00±0.00   | 0.00±0.00  | 0.00±0.00  |
| Gl  | 0.156 | 32.73±3.44 | 56.63±2.31 | 0.00±0.00  | 0.00±0.00  | 40.46±4.96 | 59.31±4.06  | 20.69±5.02 | 52.10±4.93 |
|     | 0.312 | 38.74±4.92 | 58.51±4.30 | 0.00±0.00  | 0.00±0.00  | 44.32±4.81 | 83.97±1.84  | 20.89±3.71 | 77.94±3.07 |
|     | 0.625 | 42.18±4.68 | 76.79±1.60 | 0.00±0.00  | 0.00±0.00  | 45.61±4.32 | 88.05±3.23  | 21.84±4.20 | 48.53±4.93 |
| Fh  | 1.25  | 43.32±3.72 | 86.16±0.95 | 0.00±0.00  | 0.00±0.00  | 46.18±3.02 | 97.14±1.01  | 19.16±2.08 | 61.40±2.47 |
|     | 2.5   | 34.73±4.96 | 42.61±4.31 | 0.00±0.00  | 0.00±0.00  | 47.90±1.74 | 92.13±3.47  | 1.53±2.66  | 32.91±4.90 |
|     | 0.156 | 28.04±1.49 | 43.39±3.56 | 2.22±0.98  | 0.00±0.00  | 25.89±2.10 | 58.45±4.87  | 17.26±0.80 | 53.52±0.91 |
| Pib | 0.312 | 39.73±4.71 | 64.16±0.79 | 0.00±0.00  | 0.00±0.00  | 26.20±2.67 | 84.74±1.99  | 15.56±1.33 | 87.69±1.23 |
|     | 0.625 | 44.24±2.76 | 55.90±0.9  | 0.00±0.00  | 0.00±0.00  | 32.96±1.87 | 58.63±2.19  | 13.50±1.75 | 79.01±2.02 |
|     | 1.25  | 50.49±2.35 | 46.10±3.40 | 0.00±0.00  | 54.92±2.10 | 40.75±3.87 | 33.07±1.37  | 4.27±0.66  | 84.04±4.75 |
| Fh  | 2.5   | 50.80±2.93 | 33.45±3.34 | 0.00±0.00  | 54.30±5.30 | 46.49±2.42 | 0.00±0.00   | 0.00±0.00  | 86.00±5.97 |
|     | 0.156 | 9.72±0.92  | 67.13±3.15 | 0.00±0.00  | 28.64±1.78 | 15.08±3.84 | 74.6±3.64   | 17.16±4.32 | 74.30±0.48 |
|     | 0.312 | 27.92±1.89 | 76.11±2.42 | 0.00±0.00  | 34.57±4.75 | 16.50±2.92 | 77.07±2.76  | 17.16±1.72 | 85.89±1.53 |
| Fh  | 0.625 | 27.56±4.57 | 67.23±3.17 | 0.00±0.00  | 0.00±0.00  | 17.22±2.64 | 79.52±1.48  | 12.04±1.79 | 79.41±0.68 |
|     | 1.25  | 32.91±1.07 | 28.44±2.96 | 0.00±0.00  | 0.00±0.00  | 25.78±2.89 | 69.37±1.87  | 14.37±2.37 | 64.94±1.59 |
|     | 2.5   | 33.87±4.00 | 0.00±0.00  | 0.00±0.00  | 0.00±0.00  | 26.49±3.05 | 28.97±2.36  | 0.00±0.00  | 0.00±0.00  |

All experiments were done in four repetitions and the results are presented as the mean values ± standard deviations

**Table S3.** Elements of matrix  $W_1$  and vector  $B_1$  (presented in the bias row), for ANN model

| Input variables                  | 1      | 2      | 3      | 4      | 5      | 6      | 7      | 8      | 9      |
|----------------------------------|--------|--------|--------|--------|--------|--------|--------|--------|--------|
| Conc                             | -0.553 | -0.051 | -0.746 | -0.476 | -0.616 | 0.190  | -2.740 | -0.684 | -0.717 |
| Bact ( <i>L. monocytogenes</i> ) | 0.163  | 1.556  | 1.060  | 0.723  | 1.474  | 1.662  | 2.053  | 2.620  | 2.203  |
| Bact ( <i>S. enteritidis</i> )   | -1.146 | -1.419 | -1.203 | -0.256 | -2.744 | -0.517 | -0.177 | -1.383 | -2.630 |
| Funghi (Aa)                      | 0.373  | -0.565 | 2.028  | -0.462 | 0.712  | -0.199 | -1.013 | 0.721  | -1.090 |
| Funghi (Am)                      | 0.011  | 0.115  | 0.114  | 0.727  | -0.938 | 0.302  | -0.149 | -0.720 | -0.674 |
| Funghi (As)                      | 0.253  | -0.709 | 0.068  | 0.779  | -0.814 | 2.209  | 0.187  | -0.198 | -0.876 |
| Funghi (Be)                      | 0.932  | 0.429  | 0.685  | -0.226 | 0.076  | 0.209  | -0.477 | -1.086 | -0.582 |
| Funghi (Cc)                      | -0.108 | -1.808 | -1.015 | 0.361  | -2.253 | -0.574 | -1.101 | -0.522 | -0.368 |
| Funghi (Cg)                      | 0.986  | -0.796 | 0.098  | -0.003 | -0.307 | -1.918 | -0.751 | -0.573 | 1.358  |
| Funghi (Chc)                     | 0.662  | -0.202 | -0.473 | -0.493 | -0.346 | -0.088 | -0.021 | 0.189  | 0.012  |
| Funghi (Dq)                      | -0.608 | -0.677 | -0.316 | 0.711  | 0.421  | 1.488  | 2.359  | 0.973  | -0.985 |
| Funghi (Fh)                      | -2.230 | -0.107 | -0.192 | -0.288 | 0.635  | -0.860 | -0.689 | -0.268 | -1.042 |
| Funghi (Fp)                      | 0.698  | 2.361  | 0.598  | 0.358  | 0.027  | 1.433  | -0.018 | -1.657 | 2.085  |
| Funghi (Gl)                      | -2.134 | -1.388 | -1.071 | 1.461  | 0.237  | -1.725 | 1.915  | -0.343 | -0.674 |
| Funghi (Ga)                      | 0.394  | 1.893  | -1.161 | -1.078 | -1.005 | 0.870  | 1.158  | 0.138  | -0.392 |
| Funghi (Lb)                      | 0.707  | -0.125 | -0.279 | -0.443 | 1.075  | 0.645  | 0.493  | 1.437  | -0.673 |
| Funghi (Ls)                      | 0.470  | -0.115 | -0.278 | 0.470  | 0.034  | -0.872 | 1.870  | 0.399  | 0.553  |
| Funghi (Mg)                      | -0.301 | 1.824  | 0.858  | -1.234 | -0.212 | 2.763  | -2.370 | -0.406 | 1.427  |
| Funghi (PIB)                     | -0.364 | -0.081 | -0.015 | 0.792  | 0.263  | -1.782 | 1.200  | 0.060  | 1.136  |
| Funghi (Pb)                      | -0.767 | -0.490 | -0.650 | -0.698 | 0.375  | 0.788  | -2.222 | -1.056 | -0.667 |
| Funghi (Ps)                      | 0.454  | 0.414  | 0.397  | -0.365 | 0.232  | -0.986 | 1.058  | 1.805  | 0.210  |
| Funghi (Sc)                      | 0.772  | 0.587  | 0.992  | 0.587  | -0.276 | -0.305 | 0.176  | -0.921 | 2.082  |
| Funghi (Tv)                      | -1.118 | -0.547 | -0.534 | -0.518 | 0.721  | -0.295 | 0.234  | 3.168  | -1.160 |
| Extract (A)                      | 0.338  | 0.852  | -0.204 | -0.045 | 0.365  | 2.176  | 0.602  | 0.364  | -0.137 |
| Extract (V)                      | -1.341 | -0.759 | 0.053  | 0.510  | -1.634 | -0.963 | 1.295  | 0.863  | -0.270 |
| Bias                             | -1.017 | 0.090  | -0.167 | 0.459  | -1.232 | 1.146  | 1.875  | 1.236  | -0.406 |

**Table S4.** Elements of matrix  $W_2$  and vector  $B_2$  (presented in the bias column), for ANN model

| Process                       | 1      | 2      | 3      | 4      | 5      | 6     | 7     | 8      | 9     | Bias   |
|-------------------------------|--------|--------|--------|--------|--------|-------|-------|--------|-------|--------|
| Inhibition of adhesion        | 0.692  | -0.356 | -0.353 | -0.406 | -0.536 | 0.386 | 0.145 | 0.664  | 0.711 | -0.220 |
| inhibition of biofilm-forming | -0.277 | -1.608 | 0.821  | -1.178 | 0.430  | 1.168 | 1.435 | -1.328 | 1.222 | 0.224  |
